# Supplementary material for: How a marine debris environmental education program plays to strengths of linguistically diverse learners
Source: Frontiers journal article supplement (doi:10.3389/feduc.2022.1058864), 2023-01-12
Supplement: Table_1.DOCX [file Table_1.DOCX]

Supplementary Material

# Supplementary Figures and Tables

**Supplementary Table 1.** Itema factor loadingsb for Child Marine-Debris Related Behaviors Scale (*n* = 691, α = 0.68)

| **Item** | **Mean** | **SD** | **Social behaviors & settings**  **α = 0.69** | **Individual & private-sphere behaviors**  **α = 0.53** |
| --- | --- | --- | --- | --- |
| Refuse to use plastic straws at home or in restaurants. | 2.63 | 1.39 | 0.65 | 0.57 |
| Try to learn things that I can do to solve environmental problems. | 3.21 | 1.34 | 0.63 | 0.66 |
| Talk with my friends about ways to solve environmental problems. | 2.28 | 1.41 | 0.62 | 0.79 |
| Talk with my family about ways to solve environmental problems. | 2.67 | 1.44 | 0.61 | 0.80 |
| Use reusable containers instead of plastic containers. | 3.28 | 1.14 | 0.66 |  |
| Use reusable grocery bags when we go grocery shopping. | 2.90 | 1.26 | 0.65 |  |
| Use a reusable water bottle. | 3.17 | 1.05 | 0.67 |  |
| Pick up trash when I see it. | 3.35 | 1.14 | 0.68 |  |

a Each item associated with a 5-point frequency Likert scale ranging from (1) *Never* to (5) *Every chance I get*.

b PCF indicated an optimal two-factor solution that accounted for 48% of the variance, with two factors containing Eigenvalues > 1.0

**Table S2. Summary Statistics for Behavior pre- and post-scores.** Possible range of scores was from 5-40.

|  | English Primary | | |  | Linguistically Diverse | | |  | Whole Sample | | |
| --- | --- | --- | --- | --- | --- | --- | --- | --- | --- | --- | --- |
|  | mean | sd | n |  | mean | sd | n |  | mean | sd | n |
| Pre-test | 23.62 | 5.68 | 559 |  | 22.70 | 5.53 | 67 |  | 23.52 | 5.67 | 626 |
| Post-test | 24.92 | 5.74 | 543 |  | 25.27 | 5.82 | 64 |  | 24.95 | 5.74 | 607 |

**Supplemental Table 3**. Analysis of effects of Bayesian ANCOVA model. The Bayes factor indicates anecdotal evidence for alternative hypothesis with the interaction term, and anecdotal to moderate evidence for the null hypothesis for all other predictors. These are consistent with regression results reported in the main paper, as the interaction term was the strongest predictor of change in behavior.

Effects P(incl) P(excl) P(incl|data) P(excl|data) BFincl

| Teacher | 0.500 | 0.500 | 0.023 | 0.977 | 0.024 |
| --- | --- | --- | --- | --- | --- |
| Treatment Group | 0.500 | 0.500 | 0.351 | 0.649 | 0.541 |
| Linguistic Diversity | 0.500 | 0.500 | 0.195 | 0.805 | 0.242 |
| Treatment * Linguistic Diversity | 0.500 | 0.500 | 0.669 | 0.331 | 2.018 |
| Year | 0.500 | 0.500 | 0.244 | 0.756 | 0.323 |

**
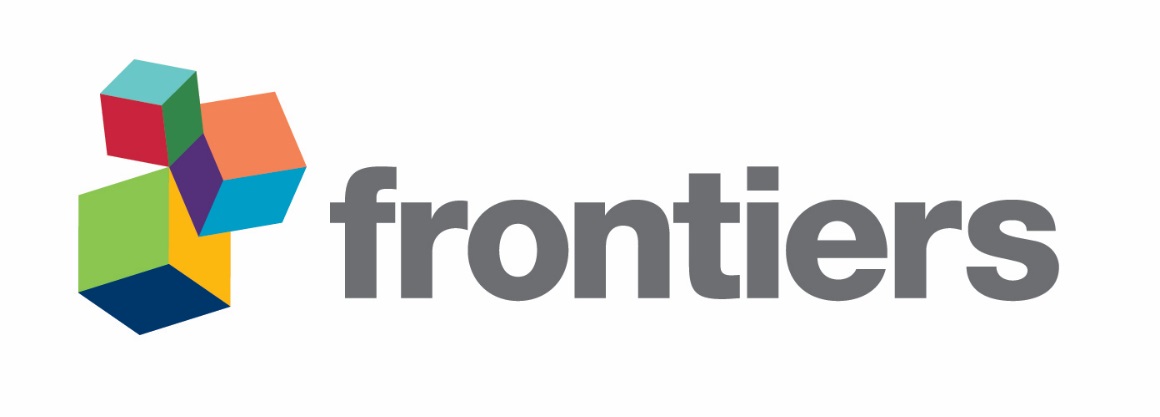
**
